# Supplementary material
Source: PubMed Central journal article supplement (PMC525471)
Supplement: molcellb_24_22_9752__1.pdf [file molcellb_24_22_9752__1.pdf]

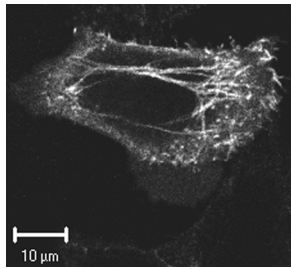

GFP-PLCδ(PH)

Supplementary Figure 1. GFP-PLCδ(PH) was transfected into HeLa cells, then visualized by immunofluorescence confocal microscopy..
