# Supplementary material
Source: PubMed Central journal article supplement (PMC525471)
Supplement: molcellb_24_22_9752__2.pdf [file molcellb_24_22_9752__2.pdf]

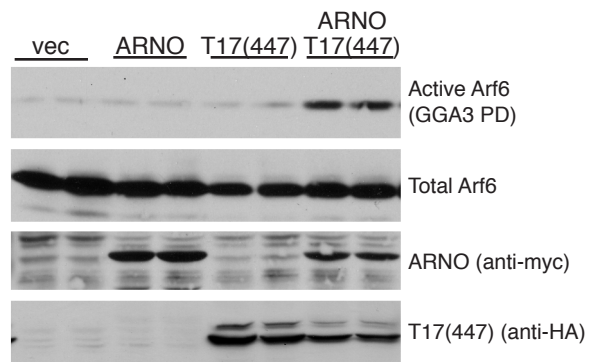

Supplemental Figure 2. HA-Arf6 was co-transfected with the indicated constructs into HeLa cells. GGA3 pulldown assays were performed as described in Material and Methods. Whole cell lysates (WCL) were immunoblotted as indicated to confirm uniform expression in all relevant samples..
